# Supplementary material for: Protein Extraction, Precipitation, and Recovery from Chlorella sorokiniana Using Mechanochemical Methods
Source: MDPI journal article supplement (doi:10.3390/en16124809), 2023-06-20
Supplement: s1 [file s1]

# Protein Extraction, Precipitation, and Recovery from *Chlorella sorokiniana* Using Mechanochemical Methods

Ashley Cutshaw, Henry Frost, Sibel Uludag-Demirer, Yan Liu and Wei Liao \*

Biosystems and Agricultural Engineering, Michigan State University,  
East Lansing, MI 48824, USA; ashley.m.cutshaw@gmail.com (A.C.); frosthe1@msu.edu (H.F.);  
demirers@msu.edu (S.U.-D.); liuyan6@msu.edu (Y.L.)

\* Correspondence: liaow@msu.edu

## SUPPLEMENTAL INFORMATION

*Table S1. Forage analysis characterization of C. sorokiniana biomass. Samples were freeze dried prior to analysis. Values represent the average of two samples*

| Component     | Value (% dry matter) |
|---------------|----------------------|
| Crude Protein | 58.3 ± 1.84          |
| ADF           | 3.70 ± 0.141         |
| NDF           | 6.70 ± 2.55          |
| Lignin        | 2.45 ± 0.0707        |
| Starch        | 2.60 ± 1.98          |
| ESC           | 4.95 ± 0.636         |
| TFA           | 9.42 ± 0.184         |
| Ash           | 9.52 ± 1.05          |
| TDN           | 82.5 ± 0.707         |

*Table S2. Results of the factorial ANOVA for optimization of mechanochemical cell disruption. More than one variable indicates the presence of a significant interaction between variables.*

| Variable                              | df | Sum Squared | Mean Squared | Statistic | P Value |
|---------------------------------------|----|-------------|--------------|-----------|---------|
| Milling media                         | 1  | 3355        | 3355         | 162.7     | 0.0000  |
| Ball to biomass ratio                 | 1  | 4.402       | 4.402        | 0.2135    | 0.6461  |
| Milling speed                         | 2  | 39.36       | 19.68        | 0.9546    | 0.3923  |
| Milling time                          | 1  | 422.4       | 422.4        | 20.49     | 0.0000  |
| KOH to biomass ratio                  | 1  | 14545       | 14545        | 705.5     | 0.0000  |
| Milling media x Ball to biomass ratio | 1  | 20.93       | 20.93        | 1.015     | 0.3189  |
| Milling media x Milling speed         | 2  | 170.9       | 85.47        | 4.146     | 0.0220  |
| Ball to biomass ratio x Milling speed | 2  | 232.0       | 116.0        | 5.627     | 0.0064  |
| Milling media x Milling time          | 1  | 2.991       | 2.991        | 0.1451    | 0.7050  |

|                                                                                             |   |        |        |        |        |
|---------------------------------------------------------------------------------------------|---|--------|--------|--------|--------|
| Ball to biomass ratio x Milling time                                                        | 1 | 0.1044 | 0.1044 | 0.0051 | 0.9436 |
| Milling speed x Milling time                                                                | 2 | 34.28  | 17.14  | 0.8312 | 0.4418 |
| Milling media x KOH to biomass ratio                                                        | 1 | 578.1  | 578.1  | 28.04  | 0.0000 |
| Ball to biomass ratio x KOH to biomass ratio                                                | 1 | 121.9  | 121.9  | 5.912  | 0.0189 |
| Milling speed x KOH to biomass ratio                                                        | 2 | 66.51  | 33.26  | 1.613  | 0.2101 |
| Milling time x KOH to biomass ratio                                                         | 1 | 212.5  | 212.5  | 10.31  | 0.0024 |
| Milling media x Ball to biomass ratio x Milling speed                                       | 2 | 18.88  | 9.440  | 0.4578 | 0.6354 |
| Milling media x Ball to biomass ratio x Milling time                                        | 1 | 34.34  | 34.34  | 1.666  | 0.2032 |
| Milling media x Milling speed x Milling time                                                | 2 | 44.38  | 22.19  | 1.076  | 0.3491 |
| Ball to biomass ratio x Milling speed x Milling time                                        | 2 | 309.4  | 154.7  | 7.504  | 0.0015 |
| Milling media x Ball to biomass ratio x KOH to biomass ratio                                | 1 | 20.77  | 20.77  | 1.008  | 0.3206 |
| Milling media x Milling speed x KOH to biomass ratio                                        | 2 | 217.8  | 108.9  | 5.281  | 0.0085 |
| Ball to biomass ratio x Milling speed x KOH to biomass ratio                                | 2 | 193.9  | 96.95  | 4.702  | 0.0138 |
| Milling media x Milling time x KOH to biomass ratio                                         | 1 | 8.764  | 8.764  | 0.4251 | 0.5176 |
| Ball to biomass ratio x Milling time x KOH to biomass ratio                                 | 1 | 114.5  | 114.5  | 5.552  | 0.0227 |
| Milling speed x Milling time x KOH to biomass ratio                                         | 2 | 38.35  | 19.17  | 0.9300 | 0.4017 |
| Milling media x Ball to biomass ratio x Milling speed x Milling time                        | 2 | 16.63  | 8.313  | 0.4032 | 0.6705 |
| Milling media x Ball to biomass ratio x Milling speed x KOH to biomass ratio                | 2 | 4.721  | 2.361  | 0.1145 | 0.8921 |
| Milling media x Ball to biomass ratio x Milling time x KOH to biomass ratio                 | 1 | 7.546  | 7.546  | 0.3660 | 0.5481 |
| Milling media x Milling speed x Milling time x KOH to biomass ratio                         | 2 | 32.38  | 16.19  | 0.7853 | 0.4619 |
| Ball to biomass ratio x Milling speed x Milling time x KOH to biomass ratio                 | 2 | 283.4  | 141.7  | 6.873  | 0.0024 |
| Milling media x Ball to biomass ratio x Milling speed x Milling time x KOH to biomass ratio | 2 | 6.848  | 3.424  | 0.1661 | 0.8475 |
